# Supplementary material for: Intravenous Thrombolysis for Acute Ischemic Stroke in Patients With Recent Direct Oral Anticoagulant Use: A Systematic Review and Meta‐Analysis
Source: PubMed Central journal article supplement — J Am Heart Assoc. 2023 Dec 18;12(24):e031669. doi: 10.1161/JAHA.123.031669 (PMC10863770; doi:10.1161/jaha.123.031669), 2023-12-18
Supplement: JAH3-12-e031669-s001.pdf [file JAH3-12-e031669-s001.pdf]

# **SUPPLEMENTAL MATERIAL**

**Table S1. Definitions of symptomatic intracerebral hemorrhage.**

| <b>sICH definition</b> | <b>NIHSS</b>           | <b>Imaging</b> |
|------------------------|------------------------|----------------|
| <b>PH</b>              | None                   | Only PH        |
| <b>NINDS</b>           | Any clinical worsening | Any ICH        |
| <b>ECASSII</b>         | $\geq 4$ NIHSS         | Any ICH        |
| <b>mSITS-MOST</b>      | $\geq 4$ NIHSS         | Only PH        |

sICH: symptomatic intracranial hemorrhage; NIHSS: National Institutes of Health Stroke Scale; PH: parenchymal hemorrhage; NINDS: National Institute of Neurological Disorders and Stroke; ECASSII: European-Australian Cooperative Acute Stroke Study 2; mSITS-MOST: modified Safe Implementation of Thrombolysis in Stroke Monitoring; ICH: intracranial hemorrhage.

**Table S2. Search strategy for each database.**

| <b>Scopus</b> |                                                                                                                                                                                                                                                                                                                                                                                                                                                                                 |         |
|---------------|---------------------------------------------------------------------------------------------------------------------------------------------------------------------------------------------------------------------------------------------------------------------------------------------------------------------------------------------------------------------------------------------------------------------------------------------------------------------------------|---------|
| Step          | Search query                                                                                                                                                                                                                                                                                                                                                                                                                                                                    | Results |
| #1            | (TITLE(stroke*) AND TITLE(Ischemic or acute or cerebral OR infarct*)) OR TITLE(Large w/3 stroke*) or (TITLE(cerebrovascular) AND TITLE(injury or failure or arrest or accident OR infarct*)) OR TITLE("ischemic cerebral") OR (TITLE(Cerebral) AND TITLE(Apoplexia or "vascular accident" or insult))                                                                                                                                                                           | 1644    |
| #2            | (( TITLE( noac* OR "thrombin inhibitors" ) OR TITLE ( new W/3 anticoagulant* ) ) OR ( TITLE ( plasminogen W/1 activator ) OR TITLE ( alteplase OR tenecteplase OR "TNK tPA" OR tnkase ) ) ) OR ( ( TITLE ( "Factor Xa" W/2 inhibitor ) OR TITLE ( direct W/2 anticoagulant* ) ) OR ( TITLE ( intravenous W/3 thrombolysis ) ) OR ( TITLE ( direct W/2 anticoagulant* ) ) OR ( TITLE ( doac* OR *aban* AND rivaroxaban OR apixaban OR edoxaban OR betrixaban OR dabigatran ) ) ) |         |
| Filters:      | ( LIMIT-TO ( DOCTYPE , "ar" ) )                                                                                                                                                                                                                                                                                                                                                                                                                                                 |         |

| <b>Pubmed/Medline</b> |                                                                                                                                                                                                                                                                                                                     |         |
|-----------------------|---------------------------------------------------------------------------------------------------------------------------------------------------------------------------------------------------------------------------------------------------------------------------------------------------------------------|---------|
| Step                  | Search query                                                                                                                                                                                                                                                                                                        | Results |
| #1                    | "Stroke"[Mh] or (stroke[ti] or "cerebrovascular"[ti] or "ischemic cerebral"[ti])                                                                                                                                                                                                                                    | 1620    |
| #2                    | ("Tissue Plasminogen Activator"[Mh] or "Factor Xa Inhibitors"[Mh] or (noac* or 'thrombin inhibitors' OR rivaroxaban OR apixaban OR edoxaban OR betrixaban OR dabigatran or alteplase OR tenecteplase OR "TNK tPA" OR tnkase)) OR (((plasminogen[ti] AND (activator[ti])) OR ((direct[ti] and (anticoagulant*[ti]))) |         |
| #3                    | ((thrombol*[ti] OR treat*[ti] OR therap*[ti]) and (intravenous[ti]))                                                                                                                                                                                                                                                |         |
| #4                    | #1 AND #2                                                                                                                                                                                                                                                                                                           |         |
| #5                    | #4 AND #3                                                                                                                                                                                                                                                                                                           |         |
| <b>Embase</b>         |                                                                                                                                                                                                                                                                                                                     |         |
| Step                  | Search query                                                                                                                                                                                                                                                                                                        | Results |
| #1                    | ((ischemic OR acute OR cerebral) NEAR/3 stroke*):ti) OR 'ischemic cerebral':ti OR ((apoplexia OR 'vascular accident' OR insult) NEAR/3 cerebr*):ti)                                                                                                                                                                 | 678     |
| #2                    | noac*:ti OR 'thrombin inhibitors':ti OR rivaroxaban:ti OR apixaban:ti OR edoxaban:ti OR betrixaban:ti OR dabigatran:ti OR alteplase:ti OR tenecteplase:ti OR "TNK tPA":ti OR tnkase:ti ((direct NEAR/2 anticoagulant*):ti) OR (('factor xa' NEAR/2 inhibitor):ti) OR ((plasminogen NEAR/2 activator):ti)            |         |
| #3                    | ((thrombol* OR treat* OR therap*) NEAR/4 intravenous) OR ((thromboly* NEAR/3 therap*):ti,ab)                                                                                                                                                                                                                        |         |

|    |           |  |
|----|-----------|--|
| #4 | #1 AND #2 |  |
| #5 | #4 AND #3 |  |

| <b>Web of Science</b> |                                                                                                                                                                                                                                                                                                                                                                                   |         |
|-----------------------|-----------------------------------------------------------------------------------------------------------------------------------------------------------------------------------------------------------------------------------------------------------------------------------------------------------------------------------------------------------------------------------|---------|
| Step                  | Search query                                                                                                                                                                                                                                                                                                                                                                      | Results |
| #1                    | TI=(stroke*) or (TI=(cerebrovascular) and TI=(injury or failure or arrest or accident OR infarct*)) OR ti=("ischemic cerebral")                                                                                                                                                                                                                                                   | 619     |
| #2                    | TI=(Noac* or "thrombin inhibitors") or ti=(New near/3 anticoagulant*) or TI=(plasminogen NEAR/2 activator) OR TI=(alteplase OR tenecteplase OR "TNK tPA" OR tkase) OR TI=("Factor Xa" NEAR/2 inhibitor) OR TI=(direct NEAR/2 anticoagulant*) OR TI=(doac* OR *aban* AND rivaroxaban OR apixaban OR edoxaban OR betrixaban OR dabigatran) OR TI=(antagonist near/3 anticoagulant*) |         |
| #3                    | TI=(Intravenous NEAR/3 Thrombolysis) OR AB=(Intravenous NEAR/3 Thrombolysis) OR TI=(Treat* near/3 intravenous) or AB=(Treat* near/3 intravenous) OR TI=(thromboly* near/3 therap*) or AB=(thromboly* near/3 therap*)                                                                                                                                                              |         |
| #4                    | #1 AND #2                                                                                                                                                                                                                                                                                                                                                                         |         |
| #5                    | #4 AND #3                                                                                                                                                                                                                                                                                                                                                                         |         |

| <b>Scielo</b> |                                                                                                                                                                                                                                                                                                                                                                                   |         |
|---------------|-----------------------------------------------------------------------------------------------------------------------------------------------------------------------------------------------------------------------------------------------------------------------------------------------------------------------------------------------------------------------------------|---------|
| Step          | Search query                                                                                                                                                                                                                                                                                                                                                                      | Results |
| #1            | TI=(stroke*) or (TI=(cerebrovascular) and TI=(injury or failure or arrest or accident OR infarct*)) OR ti=("ischemic cerebral")                                                                                                                                                                                                                                                   | 11      |
| #2            | TI=(Noac* or "thrombin inhibitors") or ti=(New near/3 anticoagulant*) or TI=(plasminogen NEAR/2 activator) OR TI=(alteplase OR tenecteplase OR "TNK tPA" OR tkase) OR TI=("Factor Xa" NEAR/2 inhibitor) OR TI=(direct NEAR/2 anticoagulant*) OR TI=(doac* OR *aban* AND rivaroxaban OR apixaban OR edoxaban OR betrixaban OR dabigatran) OR TI=(antagonist near/3 anticoagulant*) |         |
| #3            | #1 AND #2                                                                                                                                                                                                                                                                                                                                                                         |         |

| <b>CENTRAL (Cochrane Library Central Register of Controlled Trials)</b> |                                                                                                                                                                                                                                                                                                                                                                                  |         |
|-------------------------------------------------------------------------|----------------------------------------------------------------------------------------------------------------------------------------------------------------------------------------------------------------------------------------------------------------------------------------------------------------------------------------------------------------------------------|---------|
| Step                                                                    | Search query                                                                                                                                                                                                                                                                                                                                                                     | Results |
| #A                                                                      | #1 (stroke):ti<br>#2 MeSH descriptor: [Stroke] explode all trees<br>#3 ((noac* or 'thrombin inhibitors' OR rivaroxaban OR apixaban OR edoxaban OR betrixaban OR dabigatran or alteplase OR tenecteplase OR "TNK tPA" OR tkase)):ti<br>#4 ((Oral and anticoagulants)):ti<br>#5 ((thrombol* OR treat* OR therap* or recombinant)):ti<br>#6 #1 or #2<br>#7 #3 or #4<br>#8 #6 and #7 | 331     |

|  |    |           |  |
|--|----|-----------|--|
|  | #9 | #8 and #5 |  |
|--|----|-----------|--|

**\*Results until March 2023**

**Table S3. Summary of certainty of the evidence.**

| <b>Outcomes</b>                | <b>Nº of participants (studies)</b> | <b>Certainty of the evidence (GRADE)</b> | <b>Pooled Effect Size (95% CI)</b> |
|--------------------------------|-------------------------------------|------------------------------------------|------------------------------------|
| sICH (comparison)              | 246933<br>(8 observational studies) | ⊕⊕⊕○<br>Moderate <sup>a</sup>            | OR 0.95 (0.67 – 1.36)              |
| sICH (proportion)              | 3610<br>(14 observational studies)  | ⊕⊕⊕○<br>Moderate <sup>a</sup>            | 3% (3% – 4%)                       |
| Any ICH (comparison)           | 33816<br>(3 observational studies)  | ⊕⊕⊕○<br>Moderate <sup>a</sup>            | OR 1.23 (0.61 – 2.48)              |
| Any ICH (proportion)           | 1062<br>(11 observational studies)  | ⊕⊕⊕○<br>Moderate <sup>a</sup>            | 12% (7% – 19%)                     |
| Systemic Bleeding (comparison) | 205218<br>(3 observational studies) | ⊕⊕⊕○<br>Moderate <sup>a</sup>            | OR 1.27 (0.79 – 2.02)              |
| Systemic Bleeding (proportion) | 2602<br>(7 observational studies)   | ⊕⊕⊕○<br>Moderate <sup>a</sup>            | 1% (0% – 1%)                       |
| mRS at 90 days (comparison)    | 30687<br>(3 observational studies)  | ⊕⊕⊕○<br>Moderate <sup>a,b</sup>          | OR 1.22 (0.4 – 3.69)               |
| mRS at 90 days (proportion)    | 776<br>(7 observational studies)    | ⊕○○○<br>Very low <sup>a,b,c</sup>        | 57% (43% – 70%)                    |

Explanations

- a. Measured with the ROBINS-I tool.
- b. Wide confidence interval.
- c. Tau squared.

**Table S4. Table of studies excluded.**

| <b>Author</b>     | <b>Title</b>                                                                                                                                                                                                                                                      | <b>Reason for exclusion</b> |
|-------------------|-------------------------------------------------------------------------------------------------------------------------------------------------------------------------------------------------------------------------------------------------------------------|-----------------------------|
| Emberson et al    | Details of a Prospective Protocol for a Collaborative Meta-Analysis of Individual Participant Data from all Randomized Trials of Intravenous rt-PA vs. Control: Statistical Analysis Plan for the Stroke Thrombolysis Trialists' Collaborative Meta-Analysis 2013 | Irrelevant to the topic     |
| AAorn S et al     | Acute Ischemic Stroke in Term Pregnancy Treated with Recombinant Tissue Plasminogen Activator 2020                                                                                                                                                                | Irrelevant to the topic     |
| AbdelRazek et al  | Intravenous Thrombolysis for Stroke and Presumed Stroke in Human Immunodeficiency Virus-Infected Adults: A Retrospective, Multicenter US Study 2018                                                                                                               | Irrelevant to the topic     |
| Abdullah et al:   | Advance hospital notification by EMS in acute stroke is associated with shorter door-to-computed tomography time and increased likelihood of administration of tissue-plasminogen activator 2008                                                                  | Irrelevant to the topic     |
| Abraham et al     | The need for a population-based, dose optimization study for recombinant tissue plasminogen activator in acute ischemic stroke: A study from a tertiary care teaching hospital from South India 2017                                                              | Irrelevant to the topic     |
| Agarwal et al     | Redefined Measure of Early Neurological Improvement Shows Treatment Benefit of Intravenous Tissue Plasminogen Activator Treatment in NINDS Rt-PA Acute Stroke Trial at 24 Hours 2020                                                                              | Irrelevant to the topic     |
| Alamowitch et al  | European Stroke Organisation (ESO) expedited recommendation on tenecteplase for acute ischaemic stroke 2023                                                                                                                                                       | Irrelevant to the topic     |
| Alberts et al     | Risks of Stroke and Mortality in Atrial Fibrillation Patients Treated With Rivaroxaban and Warfarin 2020                                                                                                                                                          | Irrelevant to the topic     |
| Balogun et al     | A Stroke Registry Data on the Use of Intravenous Recombinant Tissue Plasminogen Activator in Stroke of Unknown Time of Onset 2016                                                                                                                                 | Irrelevant to the topic     |
| Broocks et al     | Benefit and risk of intravenous alteplase in patients with acute large vessel occlusion stroke and low ASPECTS 2022                                                                                                                                               | Irrelevant to the topic     |
| Calleja et al     | Collateral circulation on perfusion-computed tomography-source images predicts the response to stroke intravenous thrombolysis 2013                                                                                                                               | Irrelevant to the topic     |
| Chen et al:       | Neutrophil Counts to High-Density Lipoprotein Cholesterol Ratio: a Potential Predictor of Prognosis in Acute Ischemic Stroke Patients After Intravenous Thrombolysis 2020                                                                                         | Irrelevant to the topic     |
| Deitelzweig et al | An early evaluation of bleeding-related hospital readmissions among hospitalized patients with nonvalvular atrial fibrillation treated with direct oral anticoagulants 2016                                                                                       | Irrelevant to the topic     |

|                         |                                                                                                                                                                                      |                         |
|-------------------------|--------------------------------------------------------------------------------------------------------------------------------------------------------------------------------------|-------------------------|
| Demir et al             | The relationship between serum bilirubin levels and early neurological improvement in patients with acute ischemic stroke treated with intravenous tissue plasminogen activator 2022 | Irrelevant to the topic |
| Dicpingaitis et al      | Intravenous thrombolysis for treatment of pediatric acute ischemic stroke: Analysis of 20 years of population-level data in the United States 2022                                   | Irrelevant to the topic |
| Ellis et al             | Bleeding in patients with atrial fibrillation treated with dabigatran, rivaroxaban or warfarin: A retrospective population-based cohort study 2016                                   | Irrelevant to the topic |
| Eryilidiz et al         | The role of leukoaraiosis on outcomes and recombinant tissue-plasminogen activator-related symptomatic intracerebral hemorrhages in acute stroke 2020                                | Irrelevant to the topic |
| Escudero-Martinez et al | Dabigatran initiation in patients with non-valvular AF and first acute ischaemic stroke: a retrospective observational study from the SITS registry 2020                             | Irrelevant to the topic |
| Alvarez et al           | Intravenous Fibrinolysis in ischemic stroke of large vessel after reversing effect with idracizumab 2017                                                                             | Abstract                |
| Binet et al             | Systemic thrombolysis and endovascular thrombectomy in severe ischmeic stroke after dabigatran reversal with idarucizumab 2018                                                       | Abstract                |
| Frontera et al          | Recent use of Non-vitamin K antagonist oral anticoagulants and intracranial Hemorrhage Among patients with acute ischemic stroke treated with Alteplase 2022                         | Abstract                |
| Kawiorski et al         | Successful intravenous thrombolysis in acute ischaemic stroke in a patient on rivaroxaban treatment 2013                                                                             | Abstract                |
| Marsch et al            | Acute ischemic stroke in patient on treatment with non-vitamin K oral anticoagulants-safety and efficacy of NOAC plasma-level-guided therapy 2018                                    | Abstract                |
| Neumann et al           | Intravenous thrombolysis for ischemic stroke in patients receiving dabigatran 2014                                                                                                   | Abstract                |
| Seiffge et al           | Emergency measurement of plasma levels for rivaroxaban in patients with acute stroke is feasible in median of 34 minutes                                                             | Abstract                |
| Steinberger et al       | Successful intravenous alteplase use in four patients with acute ischemic stroke after dabigatran reversal with idarucizumab 2018                                                    | Abstract                |
| Suzuki et al            | Revascularization therapy in acute stroke patients treated with NOAC should be safe 2016                                                                                             | Abstract                |



|                       |                                                                                                                                                                    |             |
|-----------------------|--------------------------------------------------------------------------------------------------------------------------------------------------------------------|-------------|
| Bartoli et al         | Early Carotid Endarterectomy after Intravenous Thrombolysis for Acute Ischaemic Stroke 2009                                                                        | Case Report |
| Berliner et al        | Successful Outcome in an Adolescent with Artery of Percheron Occlusion who was Treated with Tissue Plasminogen Activator 2022                                      | Case Report |
| Bornkamm et al        | Safe intravenous thrombolysis in acute stroke despite treatment with rivaroxaban 2014                                                                              | Case Report |
| Bouchal et al         | Repeated intravenous thrombolysis in early recurrent stroke secondary to carotid web: Case report 2021                                                             | Case Report |
| Bourdial et al        | Intravenous thrombolysis in pediatric arterial ischemic stroke: A Case Report and a review of the literature 2008                                                  | Case Report |
| Camara-Lemarroj et al | Successful intravenous thrombolysis in a patient with antiphospholipid syndrome, acute ischemic stroke and severe thrombocytopenia 2016                            | Case Report |
| Cao et al             | Successful intravenous thrombolysis for acute ischemic stroke caused by aortic dissection with severe hypofibrinogenemia: a case report and Literature review 2022 | Case Report |
| Chao et al            | Thrombolysis in an acute ischemic stroke patient with rivaroxaban anticoagulation A case report 2019                                                               | Case Report |
| Folyovich et al       | Dilemma of indication for thrombolysis in a patient with acute ischemic stroke treated with a novel oral anticoagulant                                             | Case Report |
| Fontaine et al        | Alteplase for Acute Ischemic Stroke after Heparin Reversal with Protamine: A case report and Review 2017                                                           | Case Report |
| Haghighi et al        | Fibrinolytic treatment for acute ischaemic stroke in a patient on dabigatran etexilate                                                                             | Case Report |
| Giannandrea et al     | Intravenous thrombolysis in stroke after dabigatran reversal with idarucizumab                                                                                     | Case Report |

|                  |                                                                                                                                                                                                                                                                                       |                  |
|------------------|---------------------------------------------------------------------------------------------------------------------------------------------------------------------------------------------------------------------------------------------------------------------------------------|------------------|
| Von Wowern et al | 2017 REVERSAL OF THE ANTICOAGULATION EFFECTS OF DABIGATRAN ETEXILATE BY IDARUCIZUMAB IN THREE PATIENTS NEEDING URGENT SURGICAL INTERVENTION AND ONE CASE OF INTRAVENOUS THROMBOLYSIS IN ISCHAEMIC STROKE                                                                              | Case Report      |
| Bissig et al     | Acute Stroke Despite Dabigatran Anticoagulation Treated with Idarucizumab and Intravenous Tissue Plasminogen Activator 2017                                                                                                                                                           | Case Report      |
| Acampa et al     | Safety of Intravenous Thrombolysis and Mechanical Thrombectomy in Bilateral Posterior Cerebral Artery Territory Infarction 2022                                                                                                                                                       | Case Report      |
| Esmaeili et al   | Intravenous thrombolysis for acute ischemic stroke due to cardiac myxoma 2020:                                                                                                                                                                                                        | Case Report      |
| Chen et al       | Outcome of Patients Receiving Thrombolytic Therapy While on Rivaroxaban for Nonvalvular Atrial Fibrillation (from Rivaroxaban Once Daily Oral Direct Factor Xa Inhibition Compared With Vitamin K Antagonism for Prevention of Stroke and Embolism Trial in Atrial Fibrillation) 2017 | Wrong population |
| Goldhoorn et al  | Endovascular Treatment for Acute Ischemic Stroke in Patients on Oral Anticoagulants 2020: wrong population                                                                                                                                                                            | Wrong population |
| Kate et al       | Proposed approach to thrombolysis in dabigatran-treated patients presenting with ischemic stroke 2014                                                                                                                                                                                 | Wrong population |
| Purrucker et al  | Coagulation Testing in Acute Ischemic Stroke Patients Taking Non-Vitamin K Antagonist Oral Anticoagulants 2016                                                                                                                                                                        | Wrong population |
| Seiffge et al    | Recanalization therapies in acute ischemic stroke patients: impact of prior treatment with novel oral anticoagulants on bleeding complications and outcome 2015                                                                                                                       | Wrong population |
| Seiffge et al    | Feasibility of rapid measurement of Rivaroxaban plasma levels in patients with acute stroke 2016                                                                                                                                                                                      | Wrong population |
| Teow et al       | Trends in direct oral anticoagulant use in patients presenting with acute stroke 2022                                                                                                                                                                                                 | Wrong population |

|                   |                                                                                                                                                                                                 |                                    |
|-------------------|-------------------------------------------------------------------------------------------------------------------------------------------------------------------------------------------------|------------------------------------|
| Jin et al         | Intravenous tPA (Tissue-Type Plasminogen Activator) in Patients With Acute Ischemic Stroke Taking Non–Vitamin K Antagonist Oral Anticoagulants Preceding Stroke 2018: Systematic review         | Review article                     |
| Frol et al        | Intravenous Thrombolysis After Dabigatran Reversal by Idarucizumab: A Systematic Review of the Literature 2021: review                                                                          | Review article                     |
| Atti et al        | Meta-analysis of the efficacy and safety of intravenous alteplase in the treatment of acute minor ischemic stroke 2022: meta-analysis                                                           | Review article                     |
| Moroni et al      | Confidence in the Use of Direct Oral Anticoagulants in the Acute Phase of Nonvalvular Atrial Fibrillation–Related Ischemic Stroke Over the Years: A Real-World Single-Center Study 2018: Review | Review article                     |
| Seiffge et al     | Management of patients with stroke treated with direct oral anticoagulants 2018: Review                                                                                                         | Review article                     |
| Shahjouei et al   | Safety of Intravenous Thrombolysis Among Patients Taking Direct Oral Anticoagulants: A Systematic Review and Meta-Analysis                                                                      | Review article                     |
| Liu et al         | Safety of Recanalization Therapy in Patients with Acute Ischemic Stroke Under Anticoagulation: A Systematic Review and Meta-Analysis                                                            | Review article                     |
| Kam et al         | Recent Use of Non–Vitamin K Antagonist Oral Anticoagulants and Intracranial Hemorrhage Among Patients With Acute Ischemic Stroke Treated With Alteplase 2022                                    | Experts' statements and guidelines |
| Testai 2017       | Intravenous thrombolysis in a stroke patient taking dabigatran                                                                                                                                  | Experts' statements and guidelines |
| Tsivgoulis et al  | 2017 Intravenous Thrombolysis in Acute Ischemic Stroke Patients Pretreated With Non–Vitamin K Antagonist Oral Anticoagulants                                                                    | Experts' statements and guidelines |
| WEBB ET AL        | 2022 Recent Use of Non-Vitamin K Antagonist Oral Anticoagulants and Intracranial Hemorrhage Among Patients With Acute Ischemic Stroke Treated With Alteplase                                    | Experts' statements and guidelines |
| Adams H. P. et al | Emergency management of acute ischemic stroke: the evolving roles of intravenous and endovascular therapies 2013                                                                                | Experts' statements and guidelines |

|             |                                                                                                                                                                                                                                                                   |                        |
|-------------|-------------------------------------------------------------------------------------------------------------------------------------------------------------------------------------------------------------------------------------------------------------------|------------------------|
| Xian et al  | Clinical Effectiveness of Direct Oral Anticoagulants vs Warfarin in Older Patients with Atrial Fibrillation and Ischemic Stroke: Findings from the Patient-Centered Research into Outcomes Stroke Patients Prefer and Effectiveness Research (PROSPER) Study 2019 | Overlapping population |
| Oblak et al | Intravenous Thrombolysis After Idarucizumab Application in Acute Stroke Patients—A Potentially Increased Sensitivity of Thrombi to Lysis? 2019                                                                                                                    | Overlapping population |
| Frol et al  | Revascularization outcomes following acute ischemic stroke in patients taking direct oral anticoagulants: a single hospital cohort study. Journal of Thrombosis and Thrombolysis                                                                                  | Overlapping population |

**Table S5. Additional characteristics of studies.**

| Study                                  | Study design     | Country                                                                                                                    | Study period                     | sICH definition                                                                                                         |
|----------------------------------------|------------------|----------------------------------------------------------------------------------------------------------------------------|----------------------------------|-------------------------------------------------------------------------------------------------------------------------|
| Meinel et al. (2023) <sup>32</sup>     | Retrospective MC | Australia, Canada, China, England, Germany, Hong Kong, Israel, Italy, Japan, New Zealand, Norway, South Korea, Switzerland | 2008 - 2021                      | Any ICH as reported by the site investigators within 36 hours after IVT with worsening NIHSS score of at least 4 points |
| Kam et al. (2022) <sup>33</sup>        | Retrospective MC | United States                                                                                                              | April 1, 2015 - March 31, 2020   | Any ICH within 36 hours by either CT or MRI, with noting a clinical deterioration from that hemorrhage                  |
| Kikule et al. (2022) <sup>39</sup>     | Retrospective SC | Latvia                                                                                                                     | 2018 - 2022                      | NR                                                                                                                      |
| Okada et al. (2022) <sup>34</sup>      | Prospective SC   | Japan                                                                                                                      | March 2011 - January 2021        | ECASS-III                                                                                                               |
| Frol et al. (2021) <sup>35</sup>       | Prospective SC   | Slovenia                                                                                                                   | September 2016 – March 2020      | ECASS-II                                                                                                                |
| Beharry et al. (2020) <sup>37</sup>    | Retrospective MC | New Zealand and Australia                                                                                                  | Unknown                          | PH2                                                                                                                     |
| Kermer et al. (2020) <sup>40</sup>     | Retrospective MC | Germany                                                                                                                    | January 2016 – August 2018       | Any ICH with clinical deterioration (indicated by increase in NIHSS) with follow-up CT scan                             |
| Fang et al. (2019) <sup>38</sup>       | Retrospective MC | Taiwan                                                                                                                     | May 2016 – May 2018              | ICH that causes at least a 4-point increase of the NIHSS score or mortality                                             |
| Šaňák et al. (2018) <sup>41</sup>      | Retrospective MC | Czech Republic                                                                                                             | Unknown                          | SITS-MOST                                                                                                               |
| Xian et al. (2017) <sup>36</sup>       | Retrospective MC | United States                                                                                                              | October 2012 – March 2015        | Like Kam et al 2022                                                                                                     |
| Seiffge et al. (2017) <sup>22,23</sup> | Prospective SC   | Switzerland                                                                                                                | September 2012 – November 2016   | ECASS-II or NINDS                                                                                                       |
| Tse et al. (2017) <sup>42</sup>        | Retrospective MC | New Zealand                                                                                                                | July 1, 2016 – December 31, 2016 | PH2 and $\geq 4$ point increase in NIHSS score                                                                          |

|                                       |                  |                       |                             |                                       |
|---------------------------------------|------------------|-----------------------|-----------------------------|---------------------------------------|
| Suzuki et al. (2017) <sup>43</sup>    | Retrospective MC | Japan                 | March 2011 – February 2015  | ECASS-II                              |
| Shahjouei et al. (2015) <sup>44</sup> | Retrospective MC | United States, Greece | October 2010 – October 2014 | NINDS and Stroke tPA trial definition |

MC: Multicenter; SC: Single center; sICH: symptomatic intracranial hemorrhage; NIHSS: National Institutes of Health Stroke Scale; PH: parenchymal hemorrhage; NINDS: National Institute of Neurological Disorders and Stroke; ECASS II or III: European-Australian Cooperative Acute Stroke Study 2 or 3; mSITS-MOST: modified Safe Implementation of Thrombolysis in Stroke Monitoring. CT: computed tomography; MRI: magnetic resonance imaging; ICH: intracranial hemorrhage; NR: not reported.

**Table S6. Characteristics of Direct oral anticoagulants.**

| <b>Study</b>                               | <b>Dabigatran (n)</b> | <b>Rivaroxaban (n)</b> | <b>Apixaban (n)</b> | <b>Edoxaban (n)</b> | <b>Not specified (n)</b> | <b>DOAC within 48 hours of onset (n)</b> | <b>DOAC within 24 hours of onset (n)</b> | <b>Idarucizumab (n)</b> |
|--------------------------------------------|-----------------------|------------------------|---------------------|---------------------|--------------------------|------------------------------------------|------------------------------------------|-------------------------|
| <b>Meinel et al. 2023<sup>32</sup></b>     | 342                   | 258                    | 163                 | 68                  | 1                        | 832                                      | 400                                      | 252                     |
| <b>Kam et al. 2022<sup>33</sup></b>        | -                     | -                      | -                   | -                   | 2207                     | 25                                       | 8                                        | 0                       |
| <b>Kikule et al. 2022<sup>39</sup></b>     | 9                     | 0                      | 0                   | 0                   | 0                        | -                                        | -                                        | 9                       |
| <b>Okada et al. 2022<sup>34</sup></b>      | 6                     | 8                      | 16                  | 10                  | 0                        | 40                                       | 40                                       | 2                       |
| <b>Frol et al. 2021<sup>35</sup></b>       | 22                    | 0                      | 0                   | 0                   | 0                        | -                                        | -                                        | 22                      |
| <b>Beharry et al. 2020<sup>37</sup></b>    | 13                    | 0                      | 0                   | 0                   | 0                        | 7                                        | 7                                        | 13                      |
| <b>Kermer et al. 2020<sup>40</sup></b>     | 80                    | 0                      | 0                   | 0                   | 0                        | -                                        | -                                        | 80                      |
| <b>Fang et al. 2019<sup>38</sup></b>       | 10                    | 0                      | 0                   | 0                   | 0                        | 9                                        | 9                                        | 10                      |
| <b>Šaňák et al. 2018<sup>41</sup></b>      | 13                    | 0                      | 0                   | 0                   | 0                        | 13                                       | 13                                       | 13                      |
| <b>Xian et al. 2017<sup>36</sup></b>       | 87                    | 129                    | 35                  | 0                   | 0                        | -                                        | -                                        | 0                       |
| <b>Seiffge et al. 2017<sup>22-23</sup></b> | 0                     | 18                     | 0                   | 0                   | 33                       | 51                                       | 18                                       | 0                       |
| <b>Tse et al. 2017<sup>42</sup></b>        | 6                     | 0                      | 0                   | 0                   | 0                        | -                                        | -                                        | 6                       |
| <b>Suzuki et al. 2017<sup>43</sup></b>     | -                     | -                      | -                   | -                   | 71                       | 56                                       | -                                        | 0                       |
| <b>Shahjouei et al. 2015<sup>44</sup></b>  | 5                     | 0                      | 0                   | 0                   | 0                        | 5                                        | 5                                        | 0                       |

**Table S7. Assessment of publication bias using the Egger's test for studies including each outcome.**

| <b>Metanalysis of proportions</b> |                |
|-----------------------------------|----------------|
|                                   | <b>p-value</b> |
| <b>sICH</b>                       | 0.40           |
| <b>Any ICH</b>                    | 0.11           |
| <b>Systemic Bleeding</b>          | 0.10           |
| <b>Mortality at 90 days</b>       | 0.19           |
| <b>mRS 0-2 at 90 days</b>         | 0.15           |
| <b>Comparative analysis</b>       |                |
|                                   | <b>p-value</b> |
| <b>sICH</b>                       | 0.54           |
| <b>Any ICH</b>                    | 0.70           |
| <b>Systemic Bleeding</b>          | 0.84           |
| <b>Mortality at 90 days</b>       | 0.84           |
| <b>mRS 0-2 at 90 days</b>         | 0.23           |

---

sICH: symptomatic intracranial hemorrhage  
ICH: intracranial hemorrhage  
mRS: modified Rankin Scale



**Table S8. Sensitivity analyses, MA of proportions.**

| Outcome                                                          | No of studies | No of participants | Pooled rate (95% CI) |
|------------------------------------------------------------------|---------------|--------------------|----------------------|
| <b>DOAC use &lt; 48 hours of stroke onset</b>                    |               |                    |                      |
| sICH                                                             | 9             | 1038               | 0.03 (0.02 to 0.04)  |
| Any ICH                                                          | 6             | 869                | 0.17 (0.15 to 0.20)  |
| Systemic Bleeding                                                | 4             | 83                 | 0.01 (0.00 to 0.08)  |
| mRS 0-2 at 90 days                                               | 4             | 735                | 0.46 (0.42 to 0.49)  |
| <b>DOACs use &lt; 48 hours of stroke onset + no idarucizumab</b> |               |                    |                      |
| sICH                                                             | 5             | 717                | 0.03 (0.02 to 0.05)  |
| <b>Idarucizumab was given &lt; IVT</b>                           |               |                    |                      |
| sICH                                                             | 8             | 405                | 0.03 (0.01 to 0.07)  |
| <b>Idarucizumab was not given &lt; IVT</b>                       |               |                    |                      |
| sICH                                                             | 6             | 3150               | 0.04 (0.03 to 0.04)  |

No: number; MA: meta-analysis; DOAC: direct oral anticoagulant; mRS: modified Rankin Scale; sICH: symptomatic intracranial hemorrhage; ICH: intracranial hemorrhage; <: prior to; IVT: intravenous thrombolysis; CI: confidence interval

**Table S9. Sensitivity analyses, pairwise comparison.**

| <b>Outcome</b>                                                                          | <b>No of studies</b> | <b>DOAC: events/total</b> | <b>No DOAC: events/total</b> | <b>Odds ratio (95% CI)</b> |
|-----------------------------------------------------------------------------------------|----------------------|---------------------------|------------------------------|----------------------------|
| <b>DOAC use in last 48 hours &lt; stroke onset</b>                                      |                      |                           |                              |                            |
| <b>sICH</b>                                                                             | 6                    | 27/1009                   | 7024/202151                  | 0.79 (0.45 to 1.37)        |
| <b>DOAC use in last 48 hours &lt; stroke onset + no idarucizumab was given &lt; IVT</b> |                      |                           |                              |                            |
| <b>sICH</b>                                                                             | 5                    | 23/717                    | 7006/201398                  | 0.83 (0.55 to 1.25)        |

No: number; DOAC: direct oral anticoagulant; <: prior to

**Table S10. Summary of certainty of the evidence.**

| Outcomes                       | Nº of participants (studies)        | Certainty of the evidence (GRADE) | Pooled Effect Size (95% CI) |
|--------------------------------|-------------------------------------|-----------------------------------|-----------------------------|
| sICH (comparison)              | 246933<br>(8 observational studies) | ⊕⊕⊕○<br>Moderate <sup>a</sup>     | OR 0.95 (0.67 – 1.36)       |
| sICH (proportion)              | 3610<br>(14 observational studies)  | ⊕⊕⊕○<br>Moderate <sup>a</sup>     | 3% (3% – 4%)                |
| Any ICH (comparison)           | 33816<br>(3 observational studies)  | ⊕⊕⊕○<br>Moderate <sup>a</sup>     | OR 1.23 (0.61 – 2.48)       |
| Any ICH (proportion)           | 1062<br>(11 observational studies)  | ⊕⊕⊕○<br>Moderate <sup>a</sup>     | 12% (7% – 19%)              |
| Systemic Bleeding (comparison) | 205218<br>(3 observational studies) | ⊕⊕⊕○<br>Moderate <sup>a</sup>     | OR 1.27 (0.79 – 2.02)       |
| Systemic Bleeding (proportion) | 2602<br>(7 observational studies)   | ⊕⊕⊕○<br>Moderate <sup>a</sup>     | 1% (0% – 1%)                |
| mRS at 90 days (comparison)    | 30687<br>(3 observational studies)  | ⊕⊕⊕○<br>Moderate <sup>a,b</sup>   | OR 1.22 (0.4 – 3.69)        |
| mRS at 90 days (proportion)    | 776<br>(7 observational studies)    | ⊕○○○<br>Very low <sup>a,b,c</sup> | 57% (43% – 70%)             |

Explanations

- a. Measured with the ROBINS-I tool.
- b. Wide confidence interval.
- c. Tau squared.

**Table S11. Tau-squared for evaluation of heterogeneity.**

| <b>Outcomes</b>                         | <b>Tau2 (95% CI)</b> |
|-----------------------------------------|----------------------|
| <b>Meta-analyses of binary outcomes</b> |                      |
| Symptomatic ICH                         | 0.02 (0.00 – 1.62)   |
| Any ICH                                 | 0.42 (0.00 – 29.36)  |
| Systemic Bleeding                       | 0 (0.00 – 25.58)     |
| Mortality at 90 days                    | 0 (0.00 – 5.66)      |
| mRS 0-2 at 90 days                      | 0.93 (0.08 – 47.13)  |
| sICH (Only 48 hours)                    | 0.05 (0.00 – 5.79)   |
| sICH (Only 48 hours, no idarucizumab)   | 0.08 (0.25 – 3.19)   |
| <b>Meta-analyses of proportions*</b>    |                      |
| Symptomatic ICH                         | 0.00                 |
| sICH (Only 48 hours)                    | 0.00                 |
| Any ICH                                 | 0.42                 |
| Any ICH (Only 48 hours)                 | 0.00                 |
| Systemic Bleeding                       | 0.00                 |
| Systemic Bleeding (Only 48 hours)       | 0.00                 |
| Mortality at 90 days                    | 0.00                 |
| Mortality at 90 days (Only 48 hours)    | 0.00                 |
| mRS 0-2 at 90 days                      | 0.34                 |
| mRS 0-2 at 90 days (Only 48 hours)      | 0.00                 |
| sICH (Only 48 hours, no idarucizumab)   | 0.00                 |

mRS: modified Rankin Scale; sICH: symptomatic intracranial hemorrhage; ICH: intracranial hemorrhage; CI: confidence interval.

\*No method available to calculate the tau-squared CI.

Figure S1. Flow chart of study selection.

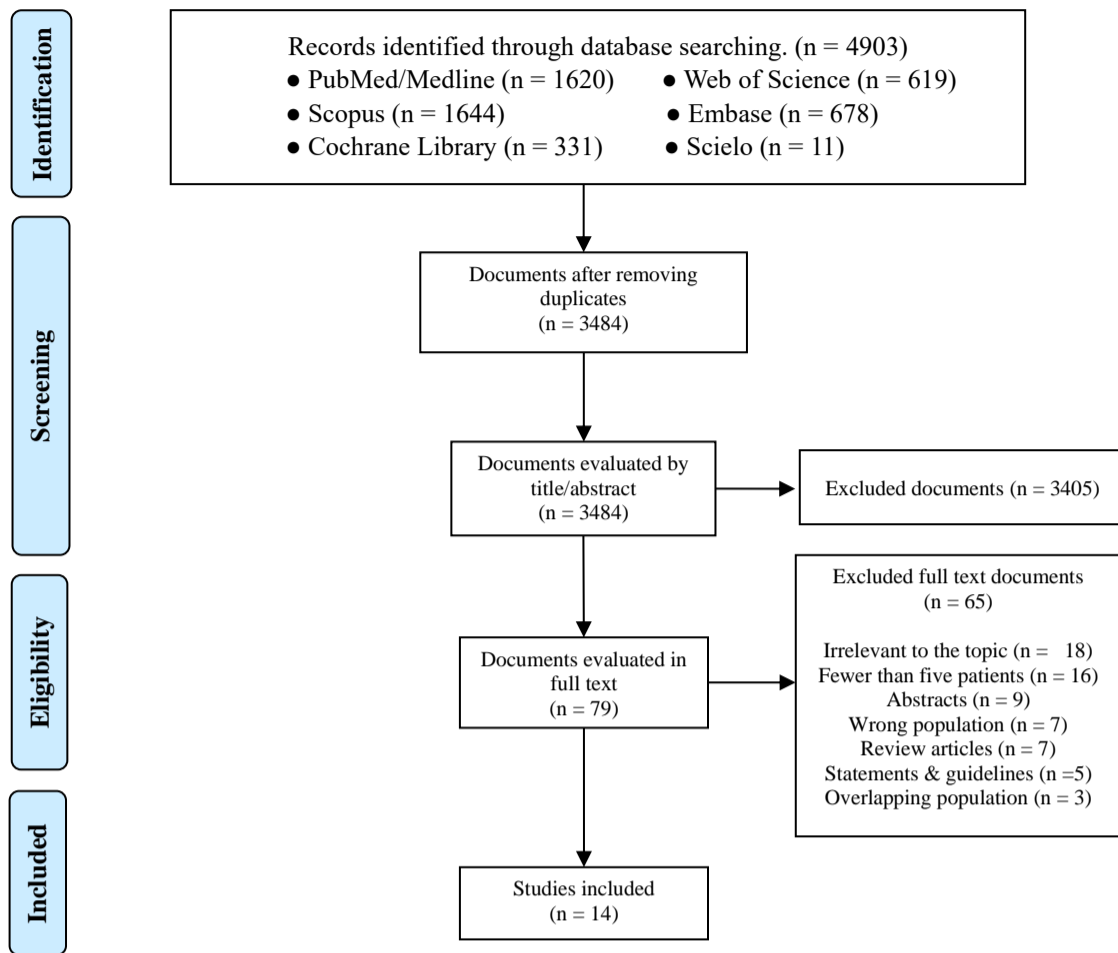

Figure S2. Traffick-light and summary plots of risk of bias of non-interventional studies, using the ROBINS-I tool.

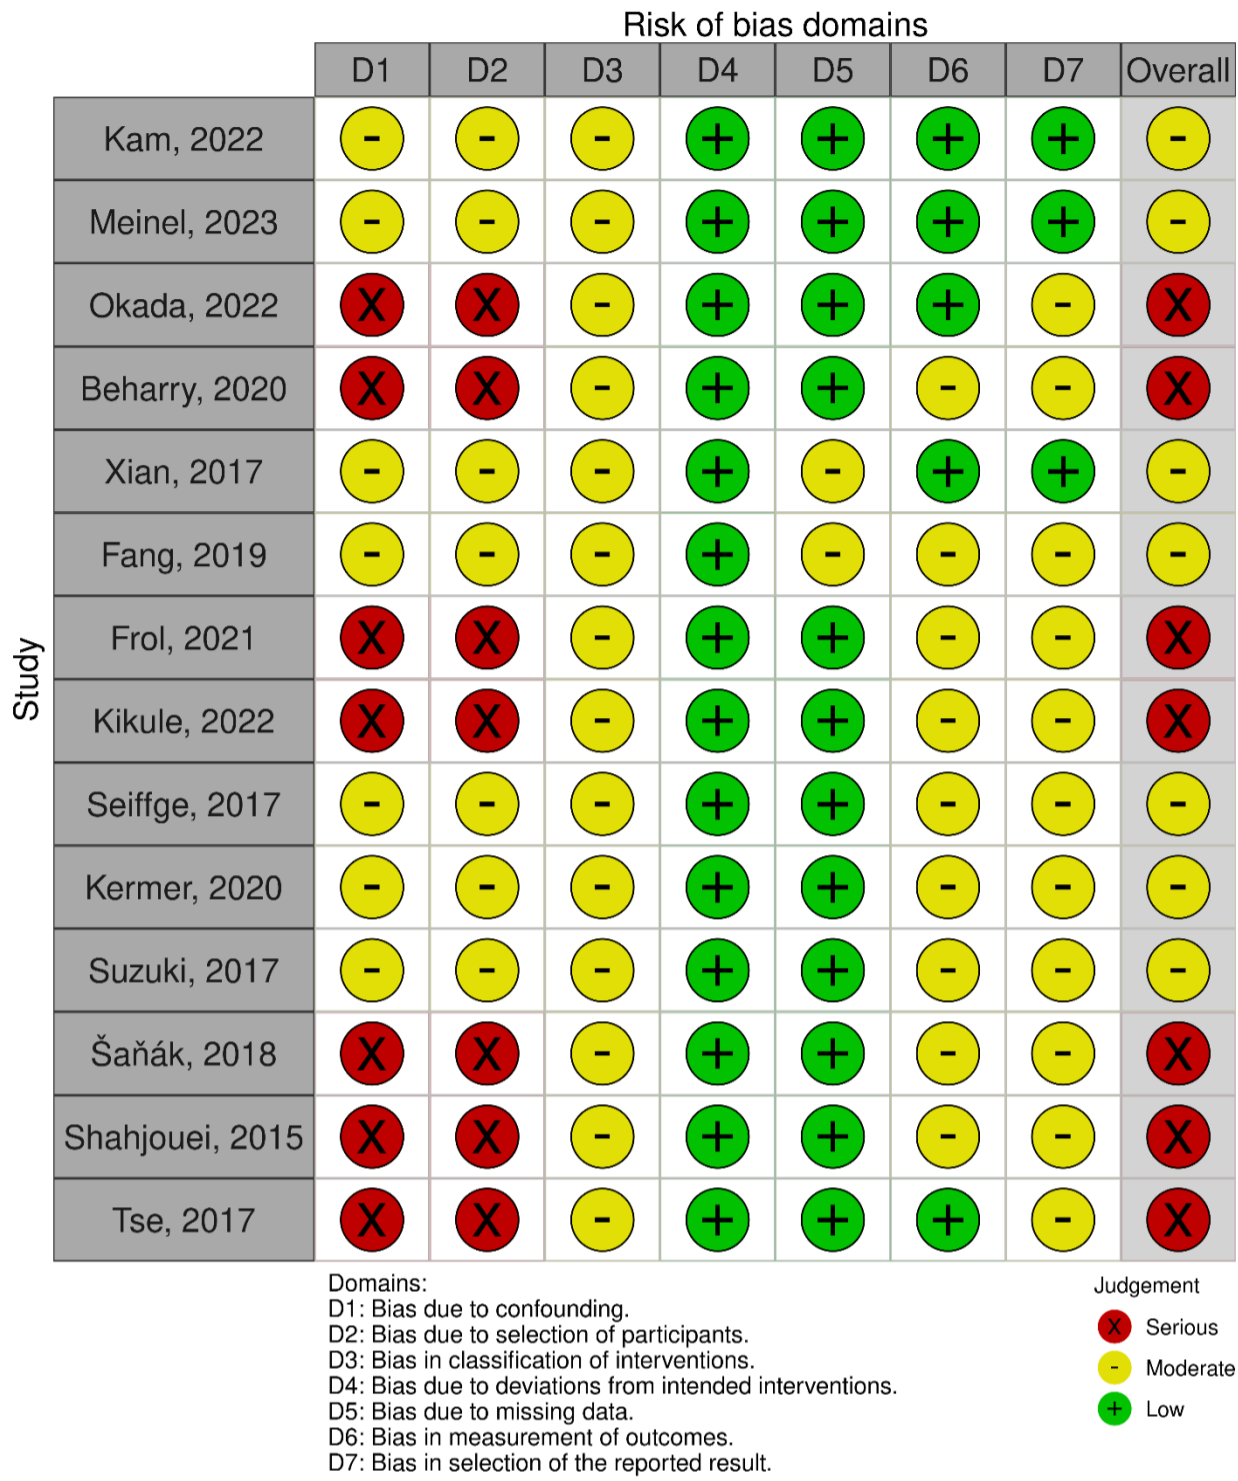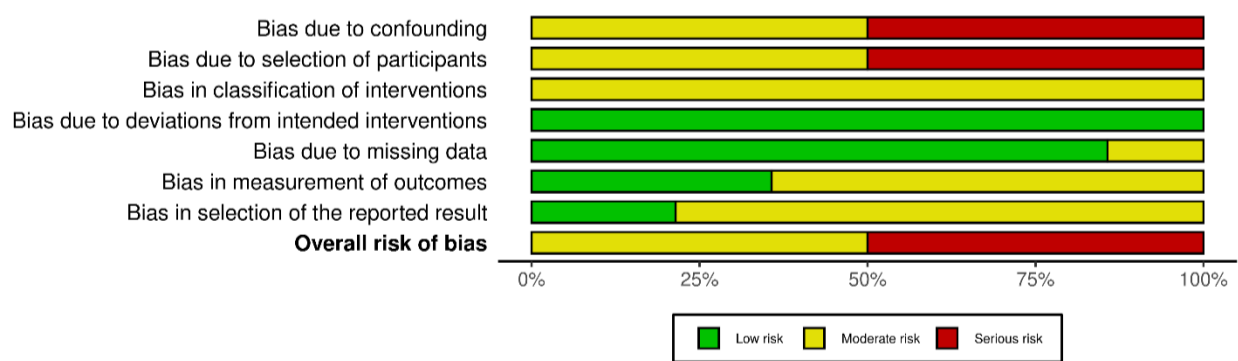

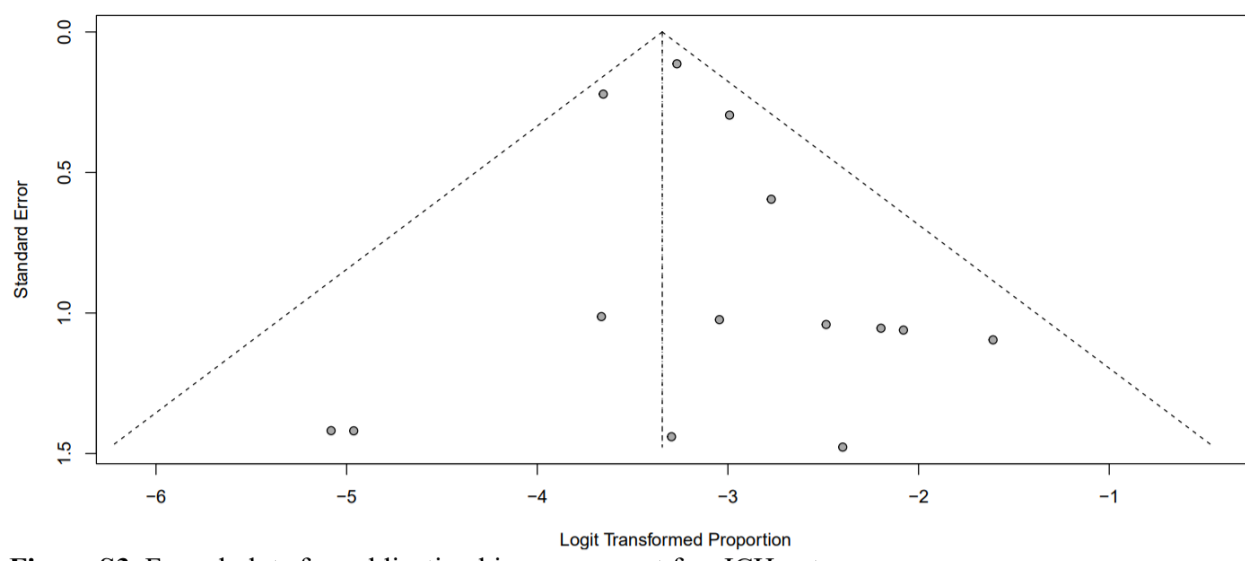

**Figure S3.** Funnel plots for publication bias assessment for sICH outcome.

sICH: symptomatic intracranial hemorrhage

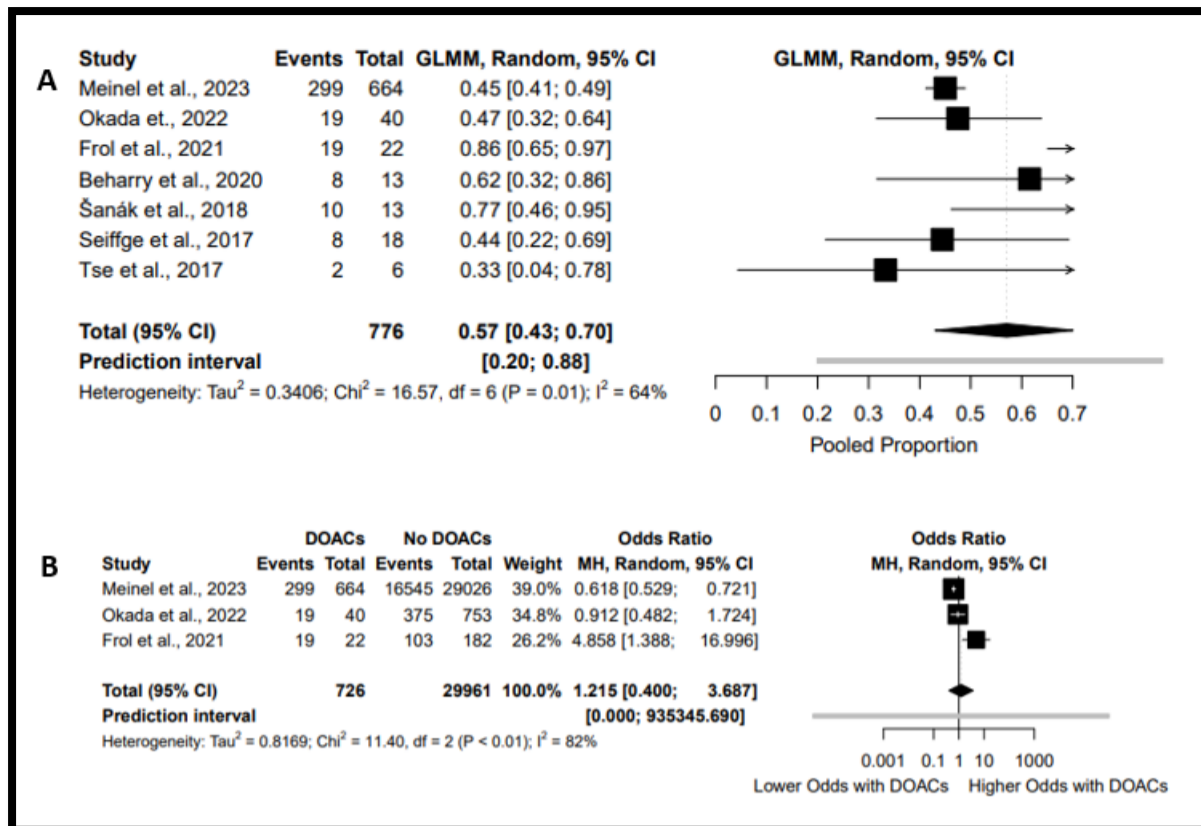

**Figure S4.** Forest plot for IVT in patients were taking DOAC for functional independence at 90 days.

A: referring to the meta-analysis of proportions. B: referring to the comparative analysis.

CI: confidence interval; DOAC: direct oral anticoagulant

sICH: symptomatic intracranial hemorrhage



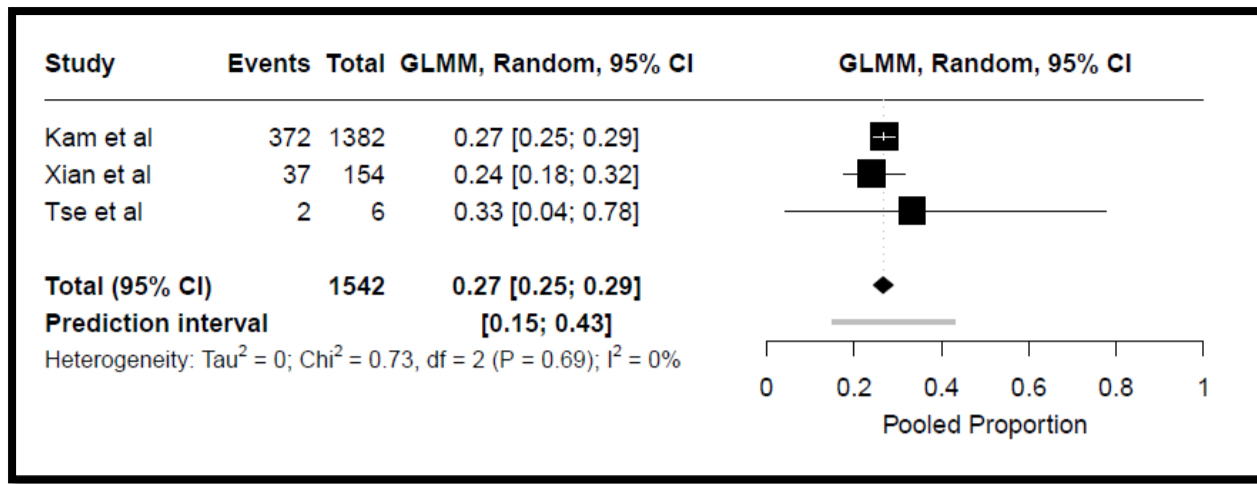

**Figure S5.** Forest plot for IVT in patients were taking DOAC for excellent outcome (mRS 0-1) at 90 days.

CI: confidence interval

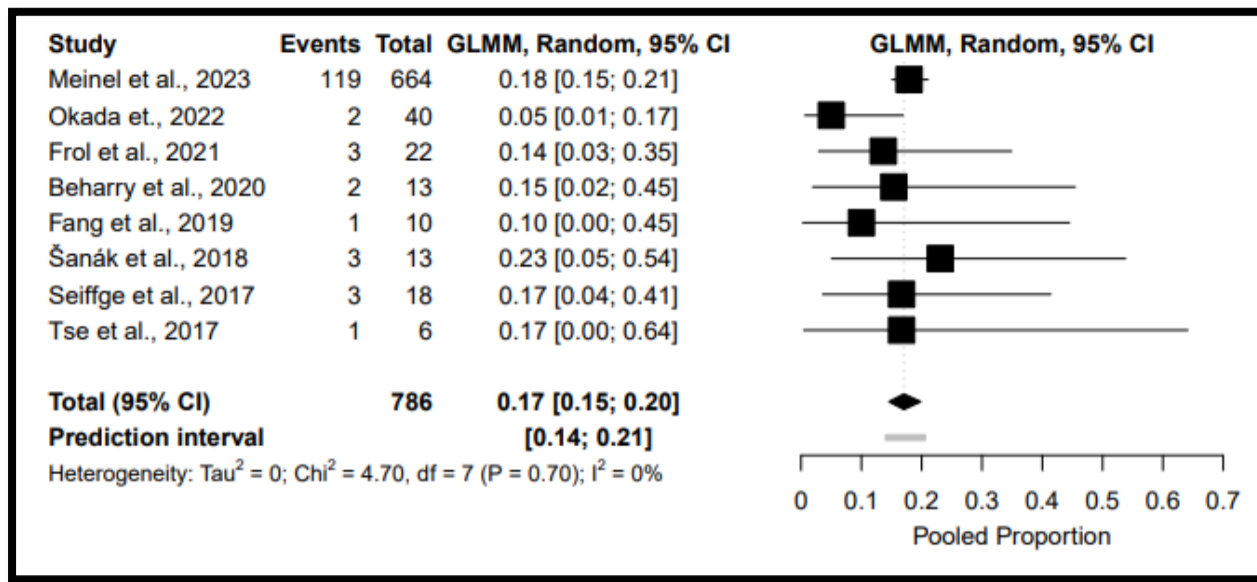

**Figure S6.** Forest plot for proportion of mortality at 90 days in patients who received IVT and were taking DOAC.

CI: confidence interval

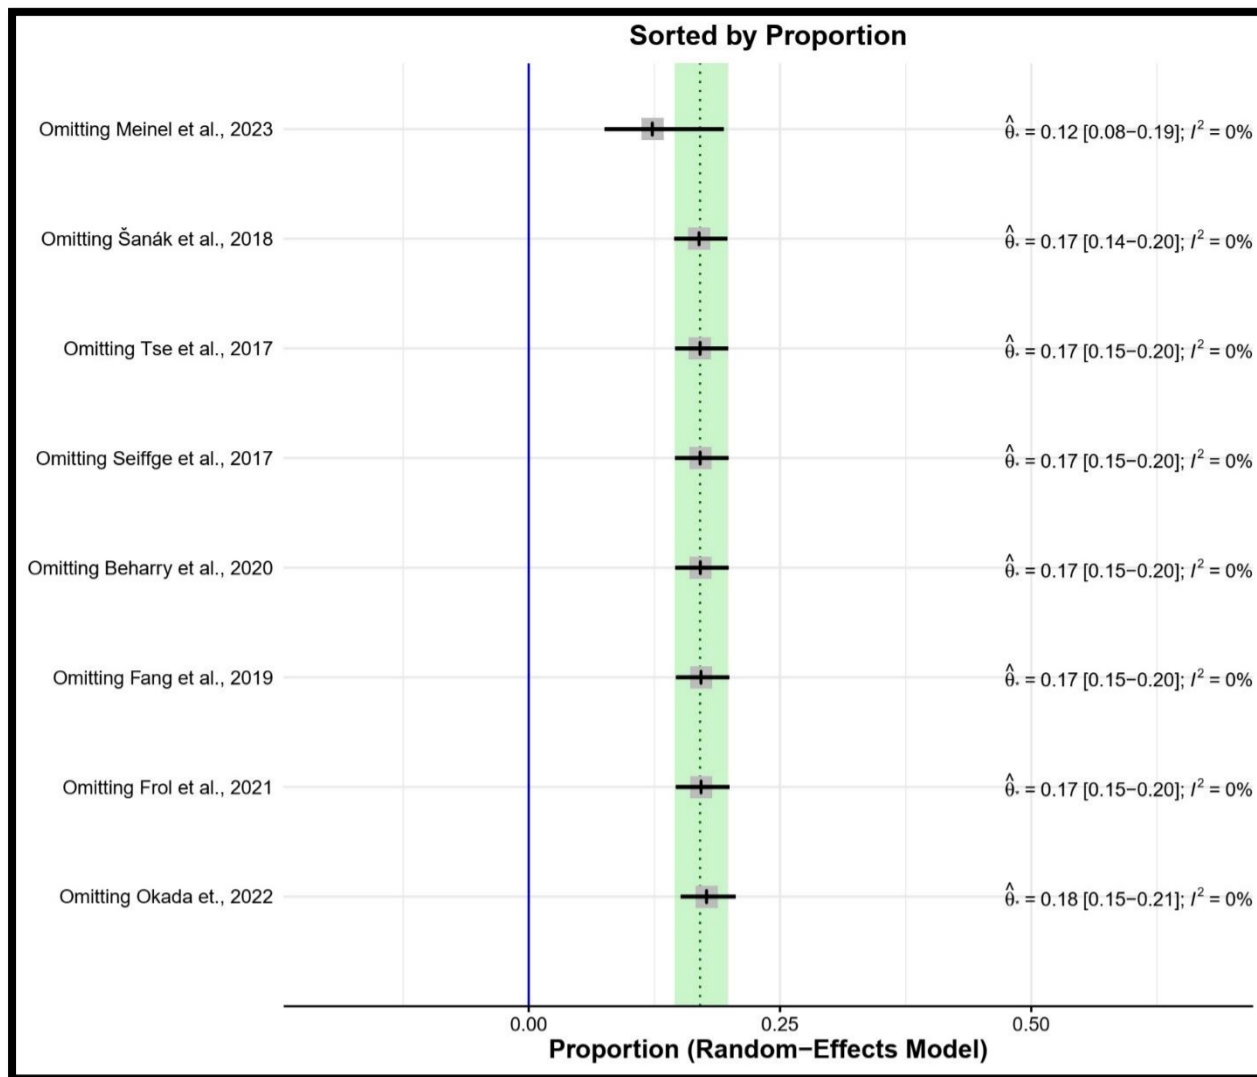

**Figure S7.** Sensitivity analysis for proportion of mortality at 90 days in patients who received IVT and were taking DOAC.

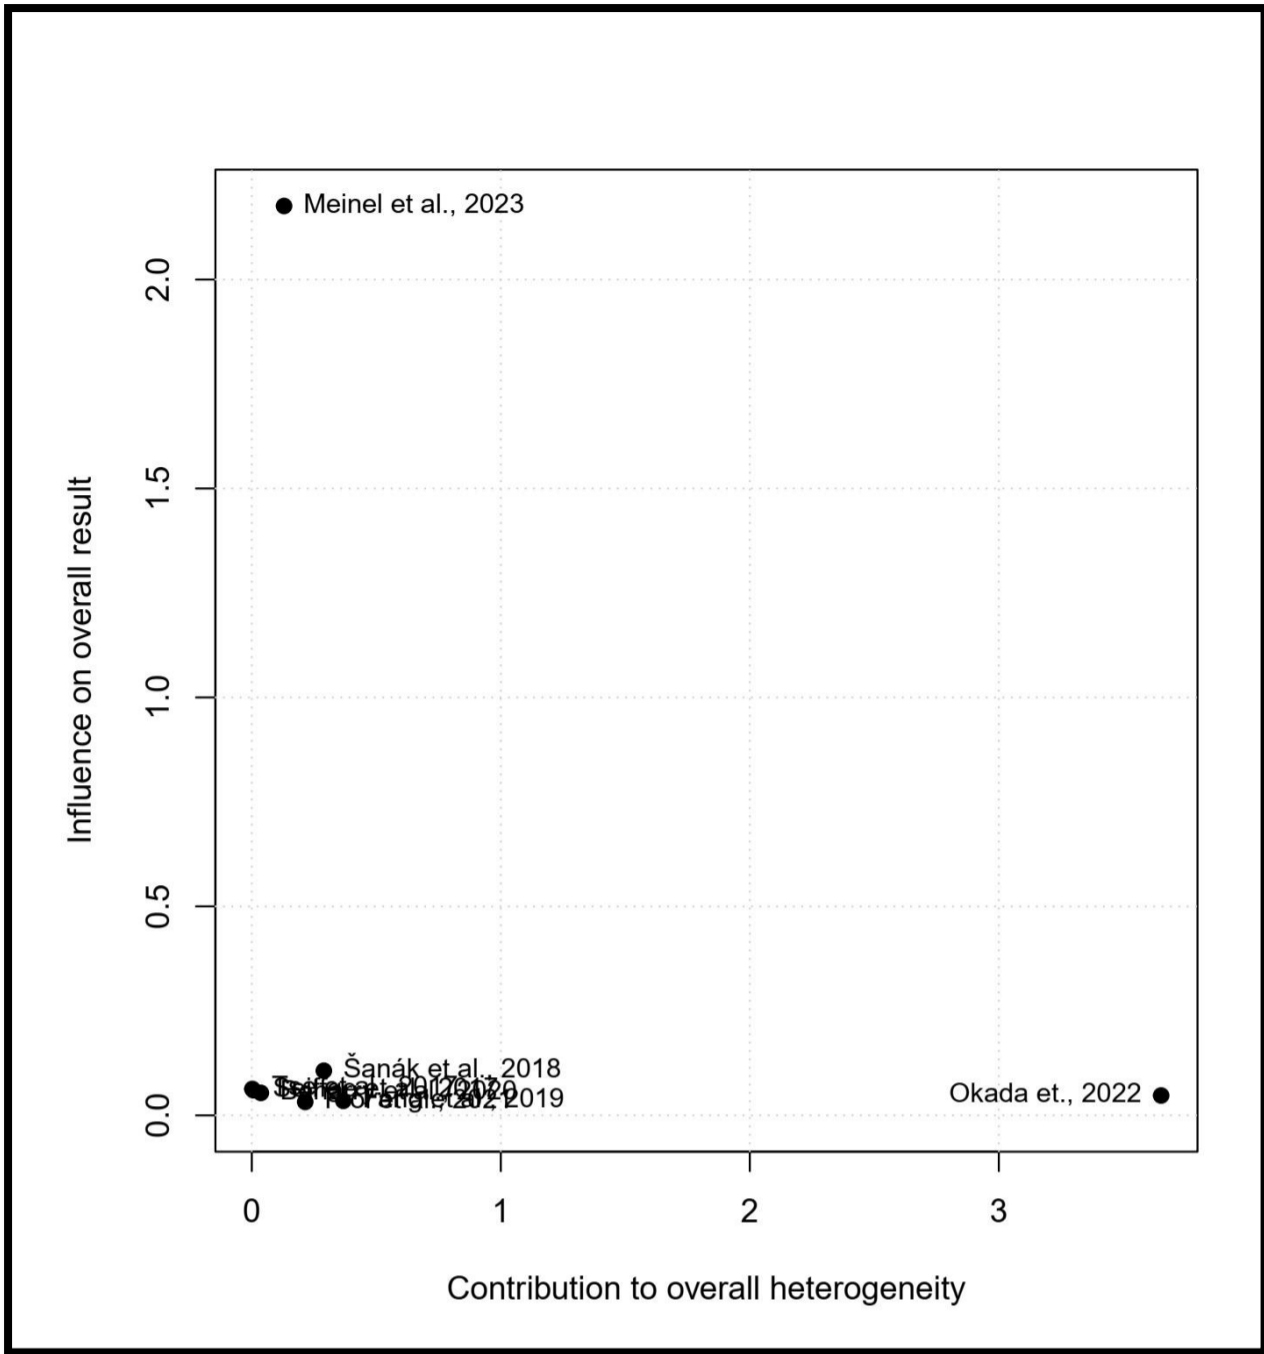

**Figure S8.** Baujat plot for proportion of mortality at 90 days in patients who received IVT and were taking DOAC.

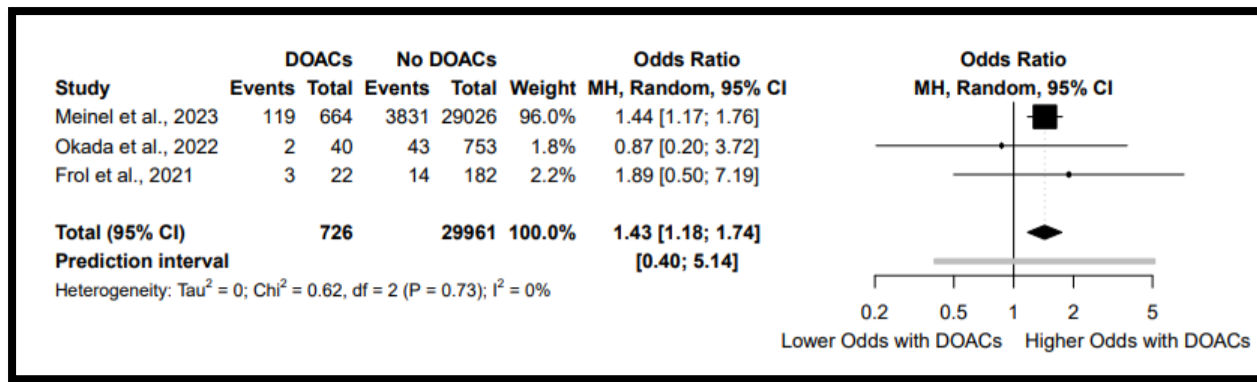

**Figure S9.** Forest plot for comparison in mortality rate for IVT between patients were taking DOAC vs who were not taking DOAC.

CI: confidence interval

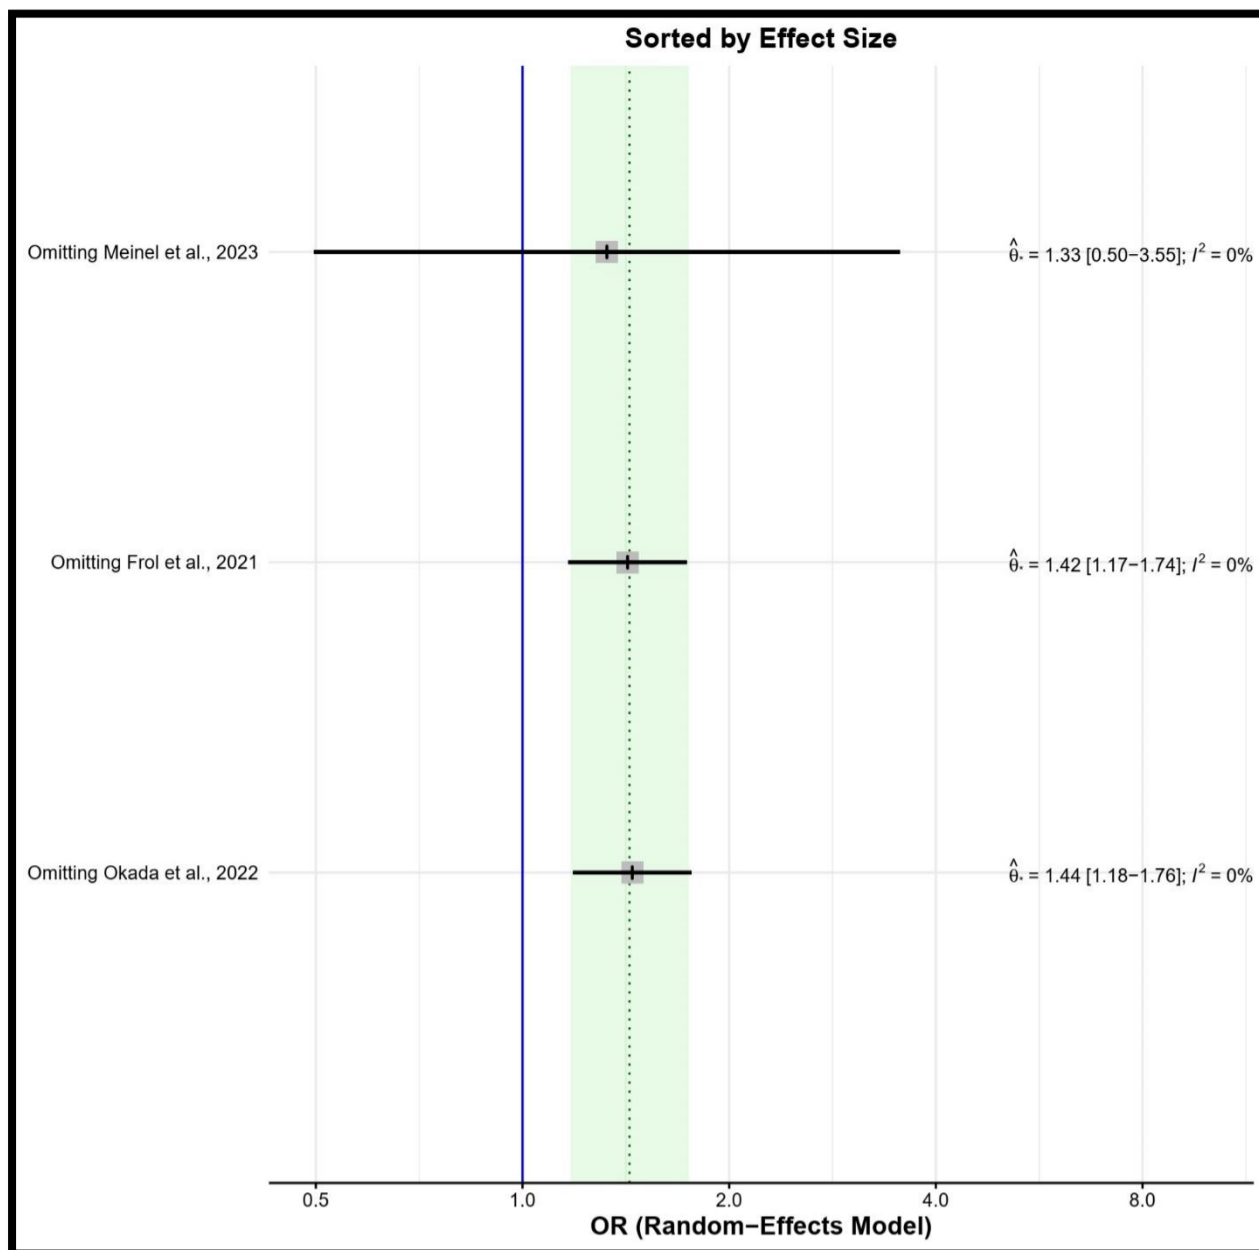

**Figure S10.** Sensitivity analysis for comparison of mortality at 90 days in patients who received IVT and were taking DOAC as compared to none.

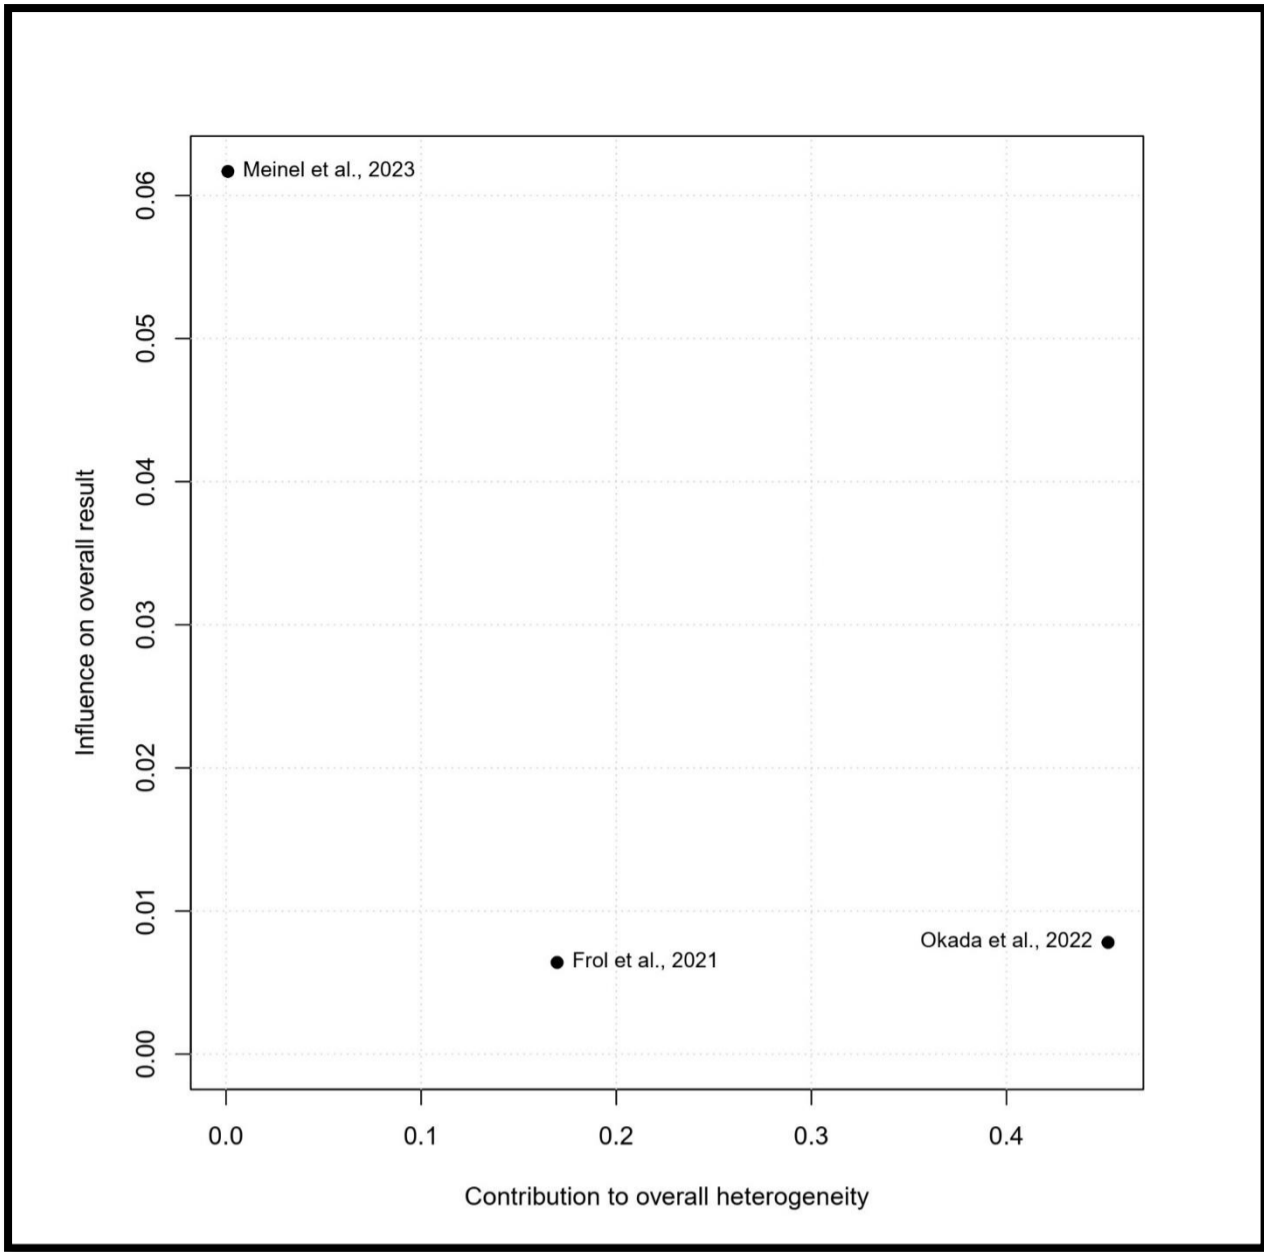

**Figure S11.** Baujat plot for comparison of mortality at 90 days in patients who received IVT and were taking DOAC as compared to none.

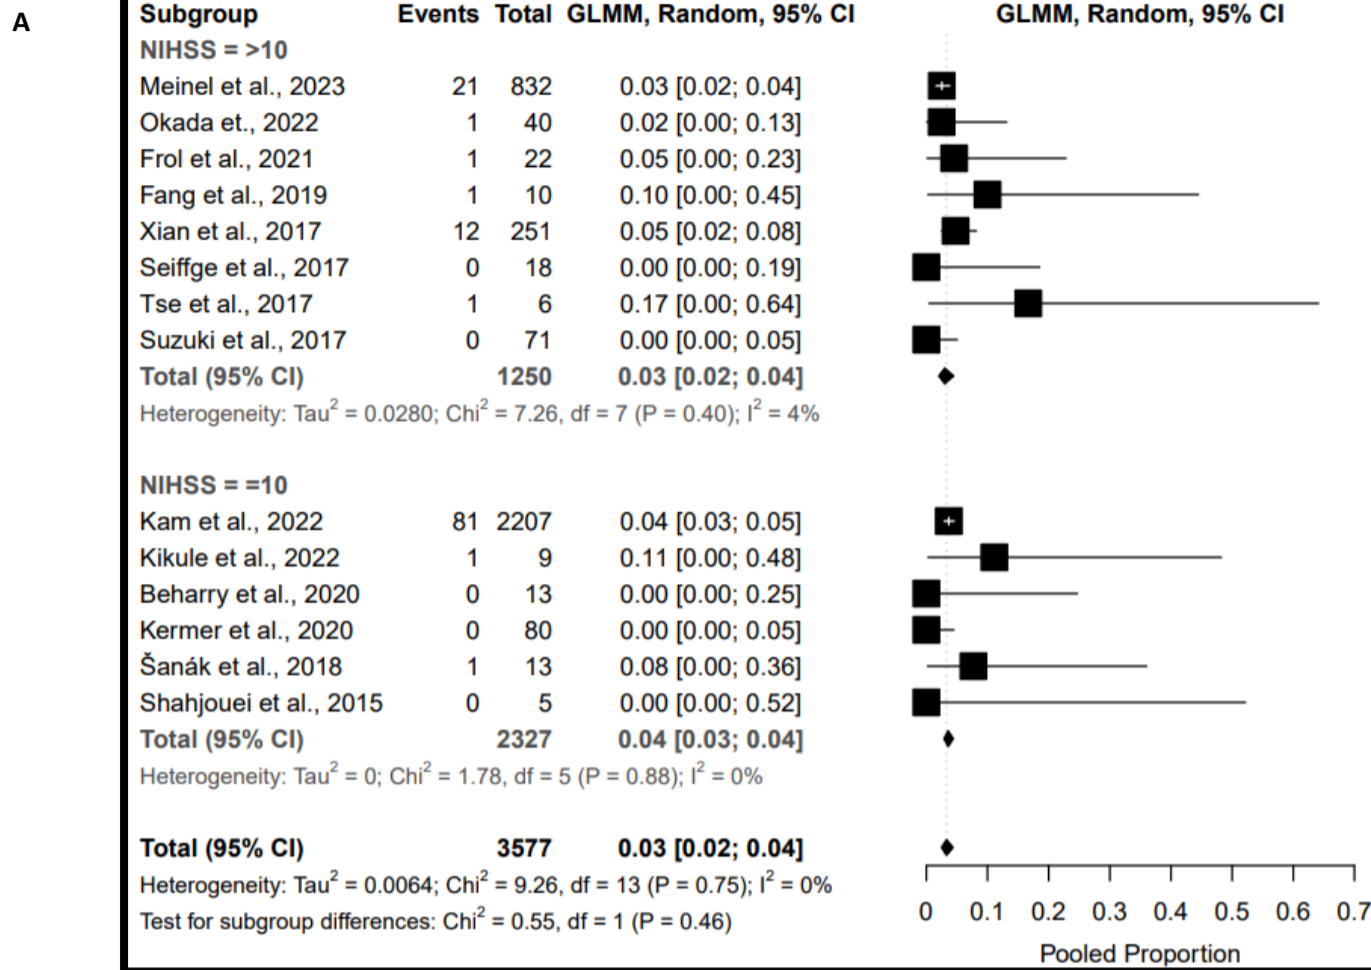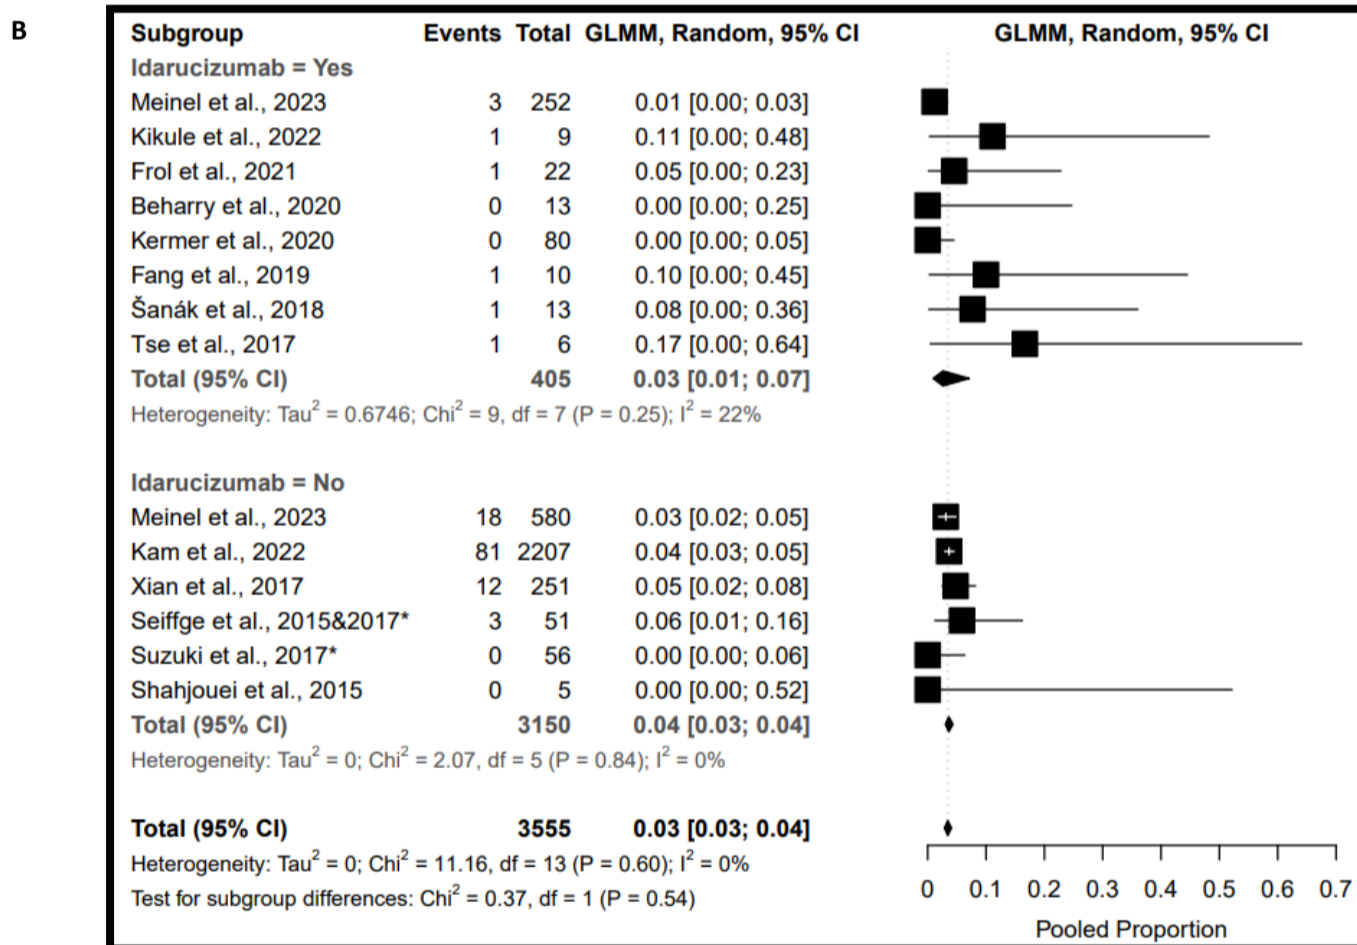

**Figure S12.** Forest plot for subgroup analysis for sICH.

A: NIHSS >10 vs. ≤10. B: received idarucizumab vs. no idarucizumab. \*: direct communication with the authors.  
sICH: symptomatic intracranial hemorrhage; NIHSS: National Institutes of Health Stroke Scale; CI: confidence interval.
